# Supplementary material for: Assessment of Peripapillary Choroidal Microvasculature and Retinal Nerve Fiber Layer Thickness by Optical Coherence Tomography Angiography in Primary Open Angle Glaucoma Patients
Source: Research Square preprint supplement (doi:10.21203/rs.3.rs-6925428/v1), 2025-10-29
Supplement: Supplementary file 1 [file fc9fab9c269791147562d356.docx]

**Table (1):** Comparison of characteristics in group A patients with and without MVD.

|  | **POAG without MvD**  **N= 33** | **POAG with MvD**  **N= 8** | **P-value** |
| --- | --- | --- | --- |
| **IOP (mm Hg)**  **Mean ±SD** | 12.59 ±1.48 | 14.28 ±2.11 | 0.04 |
| **C-D ratio**  **Mean ±SD** | 0.79 ±0.08 | 0.742 ±0.1 | 0.22 |
| **Mean arterial B/P (mm Hg) Mean ±SD** | 128.19 ±7.09 | 130.17 ±6.3 | 0.43 |
| **Mean ocular perfusion**  **pressure (mm Hg)**  **Mean ±SD** | 77.06 ±4.69 | 77.26 ±4.49 | 0.91 |
| **Retinal nerve fiber layer thickness**  **Mean ±SD** | 86.11±10.39 | 84.31±14.21 | 0.5 |
